# Supplementary material for: Genetic characteristics involving the PD-1/PD-L1/L2 and CD73/A2aR axes and the immunosuppressive microenvironment in DLBCL
Source: PubMed Central journal article supplement — J Immunother Cancer. 2022 Apr 1;10(4):e004114. doi: 10.1136/jitc-2021-004114 (PMC8977791; doi:10.1136/jitc-2021-004114), 2022-04-01
Supplement: jitc-2021-004114supp002.pdf [file jitc-2021-004114supp002.pdf]

Table S1. List of 307 selected genes for targeted sequencing

|          |          |         |         |                    |                |           |                   |                        |
|----------|----------|---------|---------|--------------------|----------------|-----------|-------------------|------------------------|
| ABCA7    | CARD11   | EP300   | HS1BP3  | MFSD12             | PAX5           | SCRIB     | TRAF2             | (immune-related genes) |
| ACTB     | CCND3    | EPPK1   | ID3     | MIR17HG            | PCDH17         | SEMA6D    | TRAF5             | ADORA2A                |
| ACTG1    | CD58     | ETS1    | IDH1    | MLL2               | PCGF2          | SETD1B    | TRIB3             | BTLA                   |
| ADAP1    | CD79B    | ETV6    | IDH2    | MLL3               | PCNA           | SETD5     | TRIM56            | CD274                  |
| ADCK2    | CDC42BPB | EZH2    | IGH VDJ | MPDZ               | PDGFRB         | SETDB1    | TSHZ3             | CD276                  |
| AICDA    | CDKN2A   | FAM186A | IgLL5   | MPEG1              | PIK3CA         | SGK1      | TSR1              | CD28                   |
| AK3      | CDKN2B   | FAM189B | IGSF3   | MRC2               | PIM1           | SHMT1     | TTN               | CD47                   |
| ANKRD11  | CELSR2   | FAM219B | INSL4   | MSL2               | PLC $\gamma$ 2 | SIPA1L3   | TUBA3C            | CD70                   |
| AP3D1    | CEP164   | FAM47C  | IRAK1   | MST1L              | PLD2           | SLC1A1    | UBE3B             | CD80                   |
| APOBEC3C | CHRNA7   | FAR2    | IRF4    | MUC17              | PLEC           | SMC1A     | UGT1A1            | CD86                   |
| APOBEC3F | CHRNA7   | FAS     | IRX3    | MUC4               | PLK1           | SOBP      | UGT1A8            | CTLA4                  |
| ARHGAP30 | CIITA    | FBN3    | ITPKB   | MYBPC3             | POGZ           | SOCS1     | USP27X            | FGL1                   |
| ARID1A   | CILP2    | FBXW7   | ITPR3   | MYC                | POU2F2         | SOGA2     | WBSCR28           | HAVCR2                 |
| ARID1B   | CK1a     | FCRL1   | JAK2    | MYD88 (L265P site) | POU4F3         | SPATA31C1 | WNK2              | ICOS                   |
| ARID5A   | CLIP3    | FLG2    | JAK3    | MYLK2              | PRDM1          | SPEN      | WNT10B            | ICOSLG                 |
| ARID5B   | COX19    | FLNC    | KDM5A   | MYO15A             | PRG4           | SPTBN1    | XPO1 (E571K site) | IDO1                   |
| ATM      | CPEB2    | FLOT2   | KIT     | MYO18A             | PRKCB          | SRCIN1    | ZAP70             | LAG3                   |
| ATR      | CREB3    | FOXO1   | KLF2    | MYOM2              | PRKCD          | SRGAP3    | ZFAT              | LGALS9                 |
| B2M      | CREBBP   | FOXP3   | KLHL14  | NBEAL2             | PTEN           | STAT3     | ZFP36L1           | NT5E                   |
| B3GNT7   | CRHBP    | FUT6    | KMT2D   | NBPF12             | PTPN1          | STAT6     | ZIC2              | PDCD1                  |
| BBC3     | CRIPAK   | FZD10   | KPNB1   | NEFL               | PTPN23         | SYK       | ZNF235            | PDCD1LG2               |
| BCL10    | CS       | GABBR1  | LAMC3   | NES                | PTPRD          | TBL1XR1   | ZNF343            | SIRPA                  |

|         |        |           |        |        |        |          |         |          |
|---------|--------|-----------|--------|--------|--------|----------|---------|----------|
| BCL11A  | CSMD1  | GAGE2B    | LILRA1 | NEU4   | RCL1   | TCF3     | ZNF385A | TIGIT    |
| BCL2    | CXCR4  | GAREM     | LILRA2 | NF1    | REC8   | TCHH     | ZNF585A | TNFRSF14 |
| BCL6    | DCHS1  | GLIS3     | LILRA5 | NFKB1  | RELN   | TET2     | ZNF585B | TNFRSF18 |
| BIRC3   | DDX3X  | GNA13     | LILRA6 | NFKB2  | REM1   | THEG     | ZNF608  | TNFRSF4  |
| BIRC6   | DGKZ   | GNAS      | LRP1   | NHSL1  | RFTN1  | TLN2     | ZNF646  | TNFRSF9  |
| BRAF    | DHX40  | GRIA1     | LRP1B  | NOD1   | RNF10  | TMEM184A | ZNF672  | TNFSF14  |
| BRCA2   | DMXL1  | GRIN2D    | LYN    | NOTCH1 | RNF216 | TMEM63A  | ZNF783  | TNFSF18  |
| BTG1    | DNAI1  | HIST1H1C  | MAP1A  | NOTCH2 | ROBO1  | TMSB4X   | ZNF785  | TNFSF4   |
| BTG2    | DNMT3A | HIST1H1D  | MCL1   | NOVA2  | ROBO2  | TNFAIP3  | ZNF814  | TNFSF9   |
| BTK     | DTX1   | HIST1H1E  | MDM2   | NR2F1  | RREB1  | TNXB     |         | VSIR     |
| BTNL8   | DUSP2  | HIST1H2AM | MDM4   | NUMBL  | RRM2   | TP53     |         |          |
| CACNA1I | EBF1   | HOXA3     | MEF2B  | OR10A2 | RSBN1  | TP63     |         |          |
| CALR    | ECE2   | HRAS      | MFHAS1 | OSBPL3 | SBSN   | TP73     |         |          |

Table S2. Validated somatic mutations in the targeted sequencing cohort by Sanger sequencing

| Gene Name | Chromosome start position | Chromosome end position | Refence nucleotide | Observation nucleotide | Forward primer          | Reverse primer          |
|-----------|---------------------------|-------------------------|--------------------|------------------------|-------------------------|-------------------------|
| NT5E      | 86160041                  | 86160041                | C                  | T                      | CCTAGCTGCTCGCCCCTACTCG  | CAGCCCGGCTCCTCTCTCAGTC  |
|           | 86199242                  | 86199242                | T                  | C                      | GAACACAGCAGCAGGTGAAAAG  | TGTGTGTCCTTCAGGCTAGGTT  |
| ADORA2A   | 24836830                  | 24836830                | C                  | T                      | CATGCTAGGTTGGAACAACCTGC | AGGCGTAGATGAAGGGATTAC   |
|           | 24837293                  | 24837293                | A                  | G                      | CTGAGGCAGCAAGAACCCTTC   | GGTCTCCTGGCACTCTCTCTCT  |
| CD274     | 5457327                   | 5457327                 | T                  | G                      | AGACCTGGCTGCACTAATTGTC  | CATGGCTCTGTGTTGTTTGTCTC |
|           | 5462955                   | 5462955                 | C                  | T                      | GAACCAGCCTGCATTGATACTC  | ATGCTAGGTGCTAGGGGACAGT  |
|           | 5457398                   | 5457398                 | C                  | T                      | AGACCTGGCTGCACTAATTGTC  | CATGGCTCTGTGTTGTTTGTCTC |
| PDCD1LG2  | 5557707                   | 5557707                 | T                  | C                      | GCACTTAGAATAGGGCCTGGTG  | GCTCTGAGTGGGTTTAGCATGA  |
|           | 5557629                   | 5557629                 | C                  | G                      | GTGGATGAGCTGATAGGTGCAG  | CAGTGCATTGGGTTACCATGAA  |

Table S3. Validated gene fusions in PD-L1/L2 loci by Sanger sequencing

| Sample ID | Gene fusion    | Forward primer        | Reverse primer         |
|-----------|----------------|-----------------------|------------------------|
| DL242     | CD274-SP140    | CAAATGTTGTTGGGTCATGCT | GTAGGGCTGGGTCATTGCTTAG |
| DL267     | CD274-PDCD1LG2 | ACTTCTCCATGCTGTCCCAT  | GCCTCAGTCAACTGGAGACAA  |

Table S4. List of primary antibodies used in immunohistochemistry

| Method                            | Antigen | Clone      | Species | Dilution  | Company             | Catalog no. |
|-----------------------------------|---------|------------|---------|-----------|---------------------|-------------|
| immunohistochemistry              | PD-L1   | E1L3N      | Rabbit  | 1:200     | Cell Signaling Tech | #13684      |
|                                   | PD-L2   | D7U8C      | Rabbit  | 1:100     | Cell Signaling Tech | #82723      |
|                                   | CD73    | D7F9A      | Rabbit  | 1:100     | Cell Signaling Tech | #13160      |
|                                   | A2aR    | polyclonal | Rabbit  | 1:350     | Abcam               | ab3461      |
| multiplexed<br>immunofluorescence | PD-1    | D7D5W      | Rabbit  | 1/(200×5) | Cell Signaling Tech | #84651      |
|                                   | A2aR    | polyclonal | Rabbit  | 1/(700×5) | Abcam               | ab3461      |
|                                   | CD8     | polyclonal | Rabbit  | 1/(200×5) | Abcam               | ab4055      |

Table S5. Summary of the whole-exome sequencing data of the 42 paired cases of diffuse large B-cell lymphoma

| Patient ID | Sample type  | Average sequencing | Coverage of target | Fraction of target covered | Fraction of target covered |
|------------|--------------|--------------------|--------------------|----------------------------|----------------------------|
|            |              | depth on target    | region             | with at least 20x          | with at least 50x          |
| DL004T     | tumor tissue | 91.91              | 99.92%             | 97.23%                     | 75.14%                     |
| DL006T     | tumor tissue | 105.23             | 99.92%             | 96.90%                     | 75.30%                     |
| DL008T     | tumor tissue | 79.87              | 97.61%             | 94.58%                     | 69.80%                     |
| DL012T     | tumor tissue | 82.37              | 99.68%             | 96.78%                     | 71.80%                     |
| DL014T     | tumor tissue | 98.28              | 99.94%             | 96.98%                     | 73.18%                     |
| DL015T     | tumor tissue | 81.98              | 99.67%             | 96.54%                     | 69.30%                     |
| DL016T     | tumor tissue | 94.11              | 99.93%             | 96.16%                     | 67.66%                     |
| DL017T     | tumor tissue | 102.23             | 99.69%             | 97.96%                     | 80.55%                     |
| DL023T     | tumor tissue | 82.56              | 99.68%             | 96.76%                     | 68.90%                     |
| DL024T     | tumor tissue | 80.06              | 99.69%             | 96.14%                     | 66.51%                     |
| DL026T     | tumor tissue | 99.6               | 99.94%             | 96.26%                     | 69.52%                     |
| DL027T     | tumor tissue | 86.61              | 99.93%             | 96.89%                     | 69.49%                     |
| DL028T     | tumor tissue | 92.82              | 99.93%             | 96.65%                     | 69.58%                     |
| DL029T     | tumor tissue | 87.83              | 99.70%             | 95.19%                     | 63.85%                     |
| DL030T     | tumor tissue | 85.99              | 99.69%             | 96.28%                     | 67.93%                     |
| DL031T     | tumor tissue | 90.73              | 99.68%             | 96.57%                     | 72.73%                     |
| DL037T     | tumor tissue | 89.52              | 99.93%             | 96.78%                     | 72.82%                     |
| DL040T     | tumor tissue | 94.37              | 99.92%             | 96.86%                     | 72.21%                     |
| DL041T     | tumor tissue | 80.24              | 99.69%             | 96.23%                     | 67.67%                     |
| DL042T     | tumor tissue | 86.5               | 99.90%             | 96.23%                     | 70.47%                     |
| DL043T     | tumor tissue | 94.19              | 99.92%             | 97.07%                     | 75.06%                     |
| DL044T     | tumor tissue | 81.59              | 99.92%             | 95.67%                     | 66.81%                     |
| DL045T     | tumor tissue | 91.45              | 99.67%             | 96.72%                     | 74.12%                     |
| DL046T     | tumor tissue | 84.14              | 99.66%             | 96.14%                     | 69.79%                     |
| DL047T     | tumor tissue | 86.63              | 99.91%             | 96.02%                     | 69.97%                     |
| DL048T     | tumor tissue | 93.39              | 99.93%             | 97.09%                     | 75.07%                     |
| DL049T     | tumor tissue | 88.5               | 99.91%             | 96.51%                     | 70.08%                     |
| DL050T     | tumor tissue | 100.77             | 99.92%             | 97.44%                     | 75.80%                     |
| DL052T     | tumor tissue | 95.26              | 99.67%             | 96.50%                     | 72.80%                     |
| DL054T     | tumor tissue | 99.74              | 99.91%             | 96.95%                     | 75.98%                     |
| DL055T     | tumor tissue | 95.35              | 99.67%             | 96.67%                     | 74.48%                     |
| DL056T     | tumor tissue | 102.36             | 99.71%             | 97.64%                     | 80.08%                     |
| DL057T     | tumor tissue | 100.45             | 99.70%             | 97.11%                     | 77.33%                     |
| DL058T     | tumor tissue | 82.59              | 99.68%             | 95.98%                     | 67.72%                     |
| DL059T     | tumor tissue | 90.65              | 99.92%             | 96.79%                     | 70.79%                     |
| DL060T     | tumor tissue | 90.57              | 99.91%             | 96.61%                     | 73.27%                     |

|        |              |        |        |        |        |
|--------|--------------|--------|--------|--------|--------|
| DL061T | tumor tissue | 99.39  | 99.93% | 97.77% | 78.15% |
| DL063T | tumor tissue | 88.87  | 99.93% | 94.81% | 63.97% |
| DL064T | tumor tissue | 123.07 | 99.94% | 98.35% | 83.54% |
| DL065T | tumor tissue | 93.71  | 99.92% | 96.71% | 72.51% |
| DL066T | tumor tissue | 97.45  | 99.92% | 97.26% | 75.95% |
| DL067T | tumor tissue | 99.13  | 99.93% | 97.70% | 78.35% |
| DL004W | blood        | 95.46  | 99.93% | 97.43% | 73.31% |
| DL006W | blood        | 83.71  | 99.93% | 94.99% | 62.28% |
| DL008W | blood        | 94.34  | 99.93% | 97.58% | 73.81% |
| DL012W | blood        | 92.42  | 99.68% | 97.22% | 72.85% |
| DL014W | blood        | 88.68  | 99.93% | 97.10% | 71.02% |
| DL015W | blood        | 123.2  | 99.69% | 98.67% | 86.44% |
| DL016W | blood        | 77.7   | 99.92% | 95.82% | 63.92% |
| DL017W | blood        | 104.43 | 99.69% | 98.09% | 80.08% |
| DL023W | blood        | 113.18 | 99.69% | 98.37% | 83.81% |
| DL024W | blood        | 94.2   | 99.69% | 97.66% | 76.44% |
| DL026W | blood        | 99.88  | 99.94% | 97.77% | 75.74% |
| DL027W | blood        | 89.5   | 99.93% | 96.81% | 68.75% |
| DL028W | blood        | 87.78  | 99.94% | 97.26% | 71.61% |
| DL029W | blood        | 105.6  | 99.71% | 97.77% | 76.08% |
| DL030W | blood        | 73.86  | 99.68% | 94.59% | 59.33% |
| DL031W | blood        | 95.64  | 99.69% | 97.46% | 73.77% |
| DL037W | blood        | 116.74 | 99.94% | 98.67% | 88.02% |
| DL040W | blood        | 90.78  | 99.93% | 96.39% | 68.20% |
| DL041W | blood        | 84.89  | 99.71% | 95.41% | 64.15% |
| DL042W | blood        | 96.64  | 99.93% | 96.62% | 69.89% |
| DL043W | blood        | 110.61 | 99.93% | 97.90% | 78.23% |
| DL044W | blood        | 98.6   | 99.95% | 96.88% | 71.58% |
| DL045W | blood        | 97.72  | 99.69% | 97.02% | 73.09% |
| DL046W | blood        | 92.56  | 99.68% | 97.09% | 74.48% |
| DL047W | blood        | 117.63 | 99.94% | 98.25% | 81.05% |
| DL048W | blood        | 86.69  | 99.94% | 96.17% | 66.40% |
| DL049W | blood        | 97.66  | 99.93% | 97.26% | 74.03% |
| DL050W | blood        | 109.35 | 99.92% | 98.15% | 81.40% |
| DL052W | blood        | 84.55  | 99.67% | 96.26% | 68.48% |
| DL054W | blood        | 113.6  | 99.93% | 98.06% | 79.89% |
| DL055W | blood        | 84.09  | 99.69% | 95.57% | 65.03% |
| DL056W | blood        | 102.52 | 99.71% | 97.38% | 75.38% |
| DL057W | blood        | 98.74  | 99.71% | 96.90% | 71.71% |
| DL058W | blood        | 86.37  | 99.68% | 96.84% | 72.27% |

---

|        |       |        |        |        |        |
|--------|-------|--------|--------|--------|--------|
| DL059W | blood | 73.33  | 99.90% | 95.05% | 60.48% |
| DL060W | blood | 93.02  | 99.93% | 94.85% | 63.92% |
| DL061W | blood | 95.25  | 99.93% | 95.64% | 66.52% |
| DL063W | blood | 64.15  | 99.91% | 92.90% | 52.68% |
| DL064W | blood | 94.3   | 99.94% | 96.22% | 68.03% |
| DL065W | blood | 85.06  | 99.92% | 95.04% | 63.17% |
| DL066W | blood | 101.66 | 99.93% | 97.58% | 76.47% |
| DL067W | blood | 85.79  | 99.93% | 95.59% | 65.01% |

---



Table S6. Summary in mutations of immune-related genes identified by whole-exome sequencing in 42 patients with diffuse large B-cell lymphoma

| Gene ID | Gene name | Protein  | Alias                   | Number of mutations | Patient ID                    | Mutation type                        |
|---------|-----------|----------|-------------------------|---------------------|-------------------------------|--------------------------------------|
| 3122    | HLA-DRA   | Ligand   |                         | 4                   | DL012, DL015,<br>DL023, DL067 | missense                             |
| 29126   | CD274     | Ligand   | PD-L1, B7H1             | 0                   |                               |                                      |
| 80380   | PDCD1LG2  | Ligand   | PD-L2, CD273            | 0                   |                               |                                      |
| 5133    | PDCD1     | Receptor | PD-1, CD279             | 1                   | DL043                         | missense                             |
| 3902    | LAG3      | Receptor |                         | 1                   | DL043                         | frameshift                           |
| 2267    | FGL1      | Ligand   |                         | 0                   |                               |                                      |
| 5817    | PVR       | Ligand   | CD155, HVED, PVS        | 1                   | DL061                         | missense                             |
| 79037   | PVRIG     | Receptor | CD112R                  | 1                   | DL040                         | missense                             |
| 201633  | TIGIT     | Receptor |                         | 0                   |                               |                                      |
| 5819    | NECTIN2   | Ligand   | CD112, HVEB, PVRL2      | 0                   |                               |                                      |
| 10225   | CD96      | Receptor |                         | 0                   |                               |                                      |
| 10666   | CD226     | Receptor |                         | 1                   | DL041                         | missense                             |
| 8744    | TNFSF9    | Ligand   | CD137L, 4-1BBL          | 1                   | DL050                         | missense                             |
| 3604    | TNFRSF9   | Receptor | CD137, 4-1BB            | 0                   |                               |                                      |
| 8995    | TNFSF18   | Ligand   | GITRL                   | 0                   |                               |                                      |
| 8784    | TNFRSF18  | Receptor | GITR                    | 0                   |                               |                                      |
| 51744   | CD244     | Receptor | 2B4                     | 0                   |                               |                                      |
| 23308   | ICOSLG    | Ligand   | ICOSL, B7H2             | 3                   | DL023, DL044,<br>DL058        | missense                             |
| 29851   | ICOS      | Receptor | CD278                   | 0                   |                               |                                      |
| 7292    | TNFSF4    | Ligand   | OX40L, CD134L,<br>CD252 | 0                   |                               |                                      |
| 7293    | TNFRSF4   | Receptor | OX40, CD134             | 1                   | DL063                         | frameshift                           |
| 970     | CD70      | Ligand   | TNFSF7                  | 4                   | DL024, DL027,<br>DL048, DL067 | missense,<br>nonsense,<br>frameshift |
| 939     | CD27      | Receptor | TNFRSF7                 | 1                   | DL046                         | missense                             |
| 84868   | HAVCR2    | Ligand   | Tim-3                   | 3                   | DL026, DL048,<br>DL060        | CDS-indel                            |
| 3965    | LGALS9    | Receptor | GALECTINE-9             | 1                   | DL004                         | missense                             |
| 953     | ENTPD1    | Ligand   | CD39                    | 0                   |                               |                                      |
| 3620    | IDO1      | Ligand   |                         | 0                   |                               |                                      |
| 4907    | NT5E      | Ligand   | CD73                    | 1                   | DL029                         | missense                             |
| 135     | ADORA2A   | Receptor | A2aR                    | 3                   | DL008, DL054,<br>DL061        | missense                             |

|        |          |          |                              |   |                                                                 |                         |
|--------|----------|----------|------------------------------|---|-----------------------------------------------------------------|-------------------------|
| 8764   | TNFRSF14 | Receptor | CD270, HVEM, HVEA,<br>LIGHTR | 4 | DL006, DL012,<br>DL030, DL065                                   | missense,<br>frameshift |
| 8740   | TNFSF14  | Ligand   | CD258, HVEML,<br>LIGHT       | 0 |                                                                 |                         |
| 80381  | CD276    | Receptor | B7-H3                        | 8 | DL012, DL015,<br>DL023, DL026,<br>DL027, DL042,<br>DL047, DL061 | missense                |
| 941    | CD80     | Ligand   | B7-1                         | 0 |                                                                 |                         |
| 942    | CD86     | Ligand   | B7-2                         | 0 |                                                                 |                         |
| 940    | CD28     | Receptor |                              | 0 |                                                                 |                         |
| 1493   | CTLA4    | Receptor | CD152                        | 0 |                                                                 |                         |
| 958    | CD40     | Receptor | TNFRSF5                      | 0 |                                                                 |                         |
| 959    | CD40LG   | Ligand   | CD40L, CD154,<br>TNFSF5      | 0 |                                                                 |                         |
| 961    | CD47     | Ligand   |                              | 0 |                                                                 |                         |
| 140885 | SIRPA    | Receptor |                              | 0 |                                                                 |                         |
| 64115  | VSIR     | Receptor | VISTA, B7H5                  | 0 |                                                                 |                         |

Table S7. Summary of the targeted sequencing data of the 188 patients with diffuse large B-cell lymphoma

| Patient ID | Average sequencing depth on target | Coverage of target region | Fraction of target covered with at least 50× | Fraction of target covered with at least 100× |
|------------|------------------------------------|---------------------------|----------------------------------------------|-----------------------------------------------|
| DL004T     | 364.59                             | 99.01%                    | 94.71%                                       | 90.52%                                        |
| DL005T     | 637.25                             | 99.06%                    | 96.65%                                       | 94.56%                                        |
| DL006T     | 342.63                             | 98.88%                    | 94.76%                                       | 90.38%                                        |
| DL008T     | 911.41                             | 98.97%                    | 96.76%                                       | 95.27%                                        |
| DL011T     | 991.66                             | 99.14%                    | 97.36%                                       | 96.05%                                        |
| DL012T     | 744.84                             | 99.06%                    | 96.69%                                       | 94.72%                                        |
| DL013T     | 717.74                             | 99.07%                    | 96.80%                                       | 94.84%                                        |
| DL014T     | 615.34                             | 98.74%                    | 95.67%                                       | 93.13%                                        |
| DL015T     | 1255.31                            | 98.66%                    | 95.24%                                       | 93.48%                                        |
| DL016T     | 171.24                             | 99.36%                    | 93.09%                                       | 77.47%                                        |
| DL017T     | 1544.94                            | 98.94%                    | 96.96%                                       | 95.88%                                        |
| DL019T     | 676.09                             | 99.11%                    | 96.81%                                       | 94.77%                                        |
| DL020T     | 682.05                             | 98.89%                    | 95.95%                                       | 94.01%                                        |
| DL023T     | 1090.76                            | 98.54%                    | 93.24%                                       | 90.77%                                        |
| DL024T     | 1102.73                            | 99.11%                    | 97.50%                                       | 96.28%                                        |
| DL026T     | 1223.89                            | 99.07%                    | 97.70%                                       | 96.66%                                        |
| DL027T     | 857.6                              | 98.89%                    | 96.86%                                       | 95.47%                                        |
| DL028T     | 815.65                             | 99.00%                    | 96.78%                                       | 94.96%                                        |
| DL029T     | 994.44                             | 99.06%                    | 97.21%                                       | 95.76%                                        |
| DL030T     | 592.41                             | 98.65%                    | 95.72%                                       | 93.38%                                        |
| DL031T     | 1097.6                             | 99.00%                    | 97.15%                                       | 95.66%                                        |
| DL037T     | 1072.01                            | 98.97%                    | 96.40%                                       | 94.56%                                        |
| DL038T     | 1089.37                            | 98.91%                    | 96.54%                                       | 95.03%                                        |
| DL039T     | 867.44                             | 99.04%                    | 95.52%                                       | 93.25%                                        |
| DL040T     | 1112.03                            | 99.08%                    | 97.46%                                       | 96.39%                                        |
| DL041T     | 1550.26                            | 98.93%                    | 97.24%                                       | 96.24%                                        |
| DL042T     | 1026.57                            | 98.95%                    | 97.19%                                       | 96.04%                                        |
| DL043T     | 1622.47                            | 99.02%                    | 97.63%                                       | 96.90%                                        |
| DL044T     | 1121.91                            | 98.85%                    | 97.04%                                       | 96.17%                                        |
| DL045T     | 1730.27                            | 99.00%                    | 97.58%                                       | 96.81%                                        |
| DL046T     | 874.71                             | 98.88%                    | 96.77%                                       | 95.26%                                        |
| DL047T     | 870.08                             | 98.86%                    | 96.62%                                       | 95.13%                                        |
| DL048T     | 912.53                             | 98.62%                    | 94.74%                                       | 92.71%                                        |
| DL049T     | 849.47                             | 99.06%                    | 96.72%                                       | 95.11%                                        |
| DL050T     | 916.07                             | 98.97%                    | 97.01%                                       | 95.76%                                        |
| DL052T     | 845.75                             | 98.83%                    | 95.65%                                       | 93.70%                                        |

|        |         |        |        |        |
|--------|---------|--------|--------|--------|
| DL053T | 862.27  | 98.75% | 95.68% | 93.71% |
| DL054T | 1007.16 | 99.05% | 97.43% | 96.24% |
| DL055T | 867.73  | 98.78% | 96.52% | 95.05% |
| DL056T | 977.04  | 99.05% | 97.28% | 96.10% |
| DL057T | 891.63  | 98.88% | 96.92% | 95.60% |
| DL058T | 751.7   | 98.94% | 97.03% | 95.70% |
| DL059T | 811.54  | 98.88% | 96.68% | 95.22% |
| DL060T | 1064.48 | 98.92% | 96.95% | 95.74% |
| DL061T | 911.38  | 98.92% | 96.18% | 94.47% |
| DL063T | 865.62  | 99.03% | 97.07% | 95.75% |
| DL064T | 619.56  | 99.02% | 96.25% | 93.97% |
| DL065T | 573.87  | 98.93% | 96.05% | 93.62% |
| DL066T | 452.75  | 99.24% | 96.79% | 94.76% |
| DL067T | 1007.74 | 99.11% | 97.48% | 96.39% |
| DL202  | 1048.63 | 99.02% | 97.26% | 96.24% |
| DL203  | 1096.82 | 99.35% | 97.37% | 95.99% |
| DL204  | 1105.67 | 99.31% | 97.50% | 96.26% |
| DL205  | 1326.03 | 99.23% | 97.73% | 96.78% |
| DL206  | 939.96  | 99.28% | 97.19% | 95.98% |
| DL207  | 1156.64 | 99.11% | 97.44% | 96.33% |
| DL208  | 774.25  | 99.00% | 96.16% | 94.17% |
| DL209  | 797.95  | 99.15% | 96.62% | 94.74% |
| DL210  | 726.04  | 99.00% | 96.33% | 94.48% |
| DL211  | 838.81  | 99.12% | 96.81% | 95.23% |
| DL212  | 819.84  | 98.95% | 96.61% | 95.04% |
| DL213  | 585.79  | 99.02% | 95.88% | 93.43% |
| DL214  | 1075.28 | 98.94% | 97.12% | 95.84% |
| DL215  | 952.42  | 99.24% | 97.25% | 96.03% |
| DL216  | 795.41  | 99.08% | 96.67% | 94.97% |
| DL217  | 930.17  | 98.93% | 96.78% | 95.46% |
| DL218  | 681.66  | 99.28% | 96.42% | 94.78% |
| DL219  | 1106.22 | 99.13% | 97.41% | 96.29% |
| DL220  | 684.1   | 99.28% | 96.78% | 95.16% |
| DL221  | 671.29  | 99.21% | 96.70% | 95.22% |
| DL222  | 991.89  | 99.13% | 97.33% | 96.10% |
| DL223  | 399.11  | 99.03% | 96.92% | 95.59% |
| DL224  | 892.9   | 99.20% | 97.10% | 95.84% |
| DL226  | 600.97  | 99.00% | 96.31% | 94.24% |
| DL227  | 858.05  | 98.94% | 96.86% | 95.69% |
| DL228  | 807.59  | 99.05% | 96.98% | 95.64% |

|       |         |        |        |        |
|-------|---------|--------|--------|--------|
| DL229 | 1079.72 | 99.31% | 97.67% | 96.59% |
| DL230 | 680.9   | 99.08% | 96.50% | 94.64% |
| DL231 | 637.31  | 98.87% | 96.38% | 94.48% |
| DL232 | 917.86  | 98.99% | 97.35% | 96.24% |
| DL233 | 740.38  | 98.85% | 96.35% | 94.44% |
| DL234 | 655.73  | 98.95% | 96.36% | 94.55% |
| DL235 | 808.59  | 98.91% | 96.69% | 95.22% |
| DL237 | 670.12  | 98.98% | 96.38% | 94.14% |
| DL238 | 662.72  | 98.86% | 96.35% | 94.34% |
| DL239 | 967.25  | 98.93% | 97.07% | 95.94% |
| DL240 | 693.58  | 99.06% | 96.73% | 95.08% |
| DL241 | 747.81  | 99.12% | 96.80% | 95.21% |
| DL242 | 902.86  | 98.88% | 95.56% | 93.58% |
| DL243 | 619.76  | 98.95% | 96.38% | 94.59% |
| DL244 | 594.96  | 99.05% | 96.70% | 94.75% |
| DL245 | 546.04  | 98.76% | 96.29% | 93.64% |
| DL246 | 997.81  | 98.87% | 96.80% | 95.40% |
| DL247 | 1071.35 | 99.06% | 97.24% | 96.11% |
| DL248 | 469.78  | 98.80% | 95.62% | 93.19% |
| DL249 | 1027.21 | 99.14% | 97.01% | 95.91% |
| DL250 | 861.62  | 99.03% | 97.40% | 96.12% |
| DL251 | 1331.04 | 99.12% | 97.38% | 96.43% |
| DL252 | 764.45  | 98.86% | 96.86% | 95.56% |
| DL253 | 1056.14 | 99.00% | 97.05% | 95.86% |
| DL254 | 775.16  | 98.91% | 96.63% | 95.06% |
| DL255 | 691.15  | 99.14% | 96.52% | 94.91% |
| DL256 | 633.02  | 98.93% | 96.67% | 95.49% |
| DL257 | 540.89  | 98.77% | 96.28% | 94.67% |
| DL258 | 655.9   | 98.93% | 96.87% | 95.60% |
| DL259 | 772.98  | 98.97% | 96.75% | 95.40% |
| DL260 | 1201.09 | 99.14% | 97.50% | 96.49% |
| DL261 | 1246.59 | 99.11% | 97.54% | 96.61% |
| DL262 | 542.89  | 98.84% | 96.19% | 94.38% |
| DL263 | 1010.87 | 98.90% | 97.11% | 95.92% |
| DL264 | 989.05  | 98.89% | 97.12% | 95.84% |
| DL265 | 487.92  | 98.84% | 96.24% | 94.12% |
| DL266 | 815.52  | 99.06% | 97.08% | 95.73% |
| DL267 | 792.07  | 99.03% | 96.78% | 95.54% |
| DL268 | 717.74  | 99.07% | 96.49% | 94.73% |
| DL269 | 1088.04 | 99.06% | 97.55% | 96.52% |

|       |         |        |        |        |
|-------|---------|--------|--------|--------|
| DL270 | 843.94  | 99.10% | 96.80% | 95.28% |
| DL271 | 830.11  | 99.18% | 97.20% | 95.67% |
| DL272 | 909.86  | 99.12% | 97.06% | 95.73% |
| DL273 | 736.76  | 99.07% | 97.09% | 95.79% |
| DL274 | 773.09  | 98.97% | 96.65% | 95.40% |
| DL275 | 793.68  | 99.09% | 96.96% | 95.41% |
| DL276 | 664.7   | 99.03% | 96.67% | 94.76% |
| DL278 | 190     | 98.85% | 92.15% | 81.34% |
| DL279 | 713.13  | 99.10% | 96.83% | 95.13% |
| DL280 | 1108.89 | 99.22% | 97.69% | 96.54% |
| DL281 | 1073.08 | 99.03% | 97.44% | 96.28% |
| DL282 | 1104.4  | 99.22% | 97.28% | 96.36% |
| DL283 | 1368.2  | 99.18% | 97.64% | 96.67% |
| DL284 | 1325.22 | 99.14% | 97.11% | 96.11% |
| DL285 | 1169.59 | 98.89% | 96.95% | 95.80% |
| DL287 | 864.95  | 99.06% | 97.27% | 96.04% |
| DL288 | 1227.02 | 98.87% | 94.88% | 92.77% |
| DL289 | 1215.97 | 98.90% | 97.32% | 96.36% |
| DL290 | 754.77  | 98.61% | 92.96% | 89.91% |
| DL291 | 799.01  | 98.97% | 96.79% | 95.30% |
| DL292 | 697.58  | 98.60% | 92.71% | 89.30% |
| DL293 | 584.68  | 98.19% | 89.72% | 85.35% |
| DL294 | 480.62  | 99.01% | 89.56% | 84.37% |
| DL295 | 782.46  | 98.87% | 96.63% | 95.10% |
| DL296 | 688.53  | 98.94% | 90.40% | 85.90% |
| DL297 | 860.24  | 98.96% | 97.04% | 96.05% |
| DL298 | 709.95  | 98.33% | 90.63% | 86.97% |
| DL299 | 521.79  | 99.01% | 95.80% | 92.65% |
| DL300 | 914.47  | 98.94% | 96.77% | 95.29% |
| DL301 | 482.74  | 98.87% | 95.64% | 92.53% |
| DL302 | 591.38  | 98.46% | 92.49% | 88.98% |
| DL303 | 637.65  | 98.69% | 93.35% | 90.20% |
| DL304 | 757.08  | 98.65% | 93.63% | 90.57% |
| DL305 | 496.24  | 98.71% | 95.05% | 91.78% |
| DL306 | 1323.33 | 98.96% | 97.29% | 96.25% |
| DL307 | 1227.49 | 98.90% | 97.03% | 95.88% |
| DL308 | 1134.11 | 99.00% | 97.09% | 96.02% |
| DL309 | 600.99  | 98.65% | 93.30% | 89.96% |
| DL310 | 627.06  | 98.77% | 96.05% | 94.00% |
| DL311 | 610.17  | 98.82% | 96.01% | 93.64% |

---

|       |         |        |        |        |
|-------|---------|--------|--------|--------|
| DL312 | 744.64  | 98.83% | 96.51% | 94.93% |
| DL313 | 957.15  | 98.35% | 92.41% | 89.74% |
| DL314 | 867.47  | 98.85% | 96.71% | 95.32% |
| DL315 | 640.66  | 98.73% | 95.77% | 93.31% |
| DL316 | 870.1   | 98.75% | 95.94% | 94.11% |
| DL317 | 886.66  | 98.60% | 93.51% | 90.78% |
| DL318 | 910.54  | 98.98% | 97.09% | 95.93% |
| DL319 | 698.14  | 99.01% | 96.48% | 95.00% |
| DL320 | 1172.45 | 98.92% | 96.75% | 95.41% |
| DL321 | 573.3   | 98.93% | 96.28% | 93.97% |
| DL322 | 620.14  | 98.99% | 96.37% | 94.19% |
| DL323 | 651.26  | 98.95% | 96.48% | 94.38% |
| DL324 | 1258.33 | 98.91% | 97.16% | 96.09% |
| DL325 | 1287.57 | 99.08% | 97.52% | 96.54% |
| DL328 | 873.78  | 98.97% | 96.99% | 95.68% |
| DL329 | 1086.82 | 99.07% | 96.94% | 95.55% |
| DL330 | 926.27  | 98.91% | 97.12% | 95.83% |
| DL331 | 909.9   | 98.98% | 97.05% | 95.78% |
| DL332 | 935.91  | 98.79% | 96.14% | 94.27% |
| DL333 | 1070.7  | 98.77% | 94.36% | 92.20% |
| DL334 | 1058.69 | 98.95% | 97.32% | 96.24% |
| DL335 | 875.75  | 99.00% | 97.06% | 95.82% |
| DL336 | 884.67  | 98.92% | 97.02% | 95.71% |
| DL337 | 916.44  | 98.87% | 96.79% | 95.55% |
| DL338 | 795.01  | 98.94% | 96.64% | 95.11% |
| DL339 | 849.85  | 98.90% | 96.85% | 95.37% |
| DL341 | 936.21  | 98.97% | 96.79% | 95.39% |
| DL342 | 1054.39 | 98.88% | 96.52% | 95.03% |
| DL343 | 1222.28 | 98.94% | 97.33% | 96.37% |
| DL344 | 1044.35 | 98.96% | 97.08% | 95.92% |
| DL345 | 886.48  | 98.86% | 96.91% | 95.65% |
| DL346 | 855.53  | 99.05% | 97.21% | 95.93% |

---

Table S8. List of identified somatic nonsilent mutations involving CD73/A2aR and PD-1/PD-L1/L2 loci in 188 patients with diffuse large B-cell lymphoma

| Gene Name | Patient ID*                                                | Chromosome Position | Location | Base Change | Amino Acid Change | db SNP rs#ID | COSMIC      | 1000G | prediction by SIFT |
|-----------|------------------------------------------------------------|---------------------|----------|-------------|-------------------|--------------|-------------|-------|--------------------|
| NT5E      | DL029T                                                     | chr6:86160041       | Exon 1   | C>T         | Ala62Val          | *            | *           | *     | Deleterious        |
|           | DL204,DL212,DL294                                          | chr6:86199242       | Exon6    | T>C         | Met379Thr         | rs2229524    | COSM5001961 | 0.16  | Tolerated          |
| ADORA2A   | DL242                                                      | chr22:24836830      | Exon3E   | C>T         | Arg205*           | rs1424402107 | COSM6206953 | *     | *                  |
|           | DL300                                                      | chr22:24837293      | Exon3E   | A>G         | Asn359Ser         | rs201152556  | *           | *     | Deleterious        |
| CD274     | DL065T                                                     | chr9:5457327        | Exon 3   | T>G         | Ile101Ser         | *            | *           | *     | *                  |
|           | DL227                                                      | chr9:5462955        | Exon 4   | C>T         | Gln173*           | *            | *           | *     | *                  |
|           | DL288                                                      | chr9:5457398        | Exon 3   | C>T         | Arg125*           | rs897885359  | *           | *     | Deleterious        |
| PDCD1LG2  | DL256                                                      | chr9: 5557629       | Exon 5   | C>G         | Pro215Arg         | rs561507956  | *           | *     | Deleterious        |
|           | DL008T,DL011T,DL026T,<br>DL266,DL303,DL311,<br>DL315,DL330 | chr9:5557707        | Exon 5   | T>C         | Ile241Thr         | rs7854413    | COSM3982895 | 0.28  | Deleterious        |



Table S9. Significantly enriched gene sets involved in negatively regulating the immune response in the high PD-L1/CD73 expression group versus the low PD-L1/CD73 expression group by gene set enrichment analysis in the internal cohort

| Description (PD-L1)                                       | Set Size | Enrichment Score NES | p value | FDR q value | Rank  | Leading edge                        |
|-----------------------------------------------------------|----------|----------------------|---------|-------------|-------|-------------------------------------|
| GOBP_NEGATIVE_REGULATION_OF_IMMUNE_RESPONSE               | 133      | 0.680                | 2.759   | 0.000       | 0.000 | 3783 tags=48%, list=14%, signal=42% |
| GOBP_NEGATIVE_REGULATION_OF_IMMUNE_SYSTEM_PROCESS         | 362      | 0.520                | 2.362   | 0.000       | 0.000 | 3659 tags=36%, list=14%, signal=31% |
| GOBP_NEGATIVE_REGULATION_OF_IMMUNE_EFFECTOR_PROCESS       | 115      | 0.581                | 2.332   | 0.000       | 0.000 | 3432 tags=37%, list=13%, signal=33% |
| GOBP_NEGATIVE_REGULATION_OF_ADAPTIVE_IMMUNE_RESPONSE      | 49       | 0.669                | 2.306   | 0.000       | 0.000 | 2940 tags=49%, list=11%, signal=44% |
| GOBP_NEGATIVE_REGULATION_OF_T_CELL_MEDIATED_IMMUNITY      | 20       | 0.850                | 2.378   | 0.000       | 0.000 | 2940 tags=75%, list=11%, signal=67% |
| GOBP_NEGATIVE_REGULATION_OF_CYTOKINE_PRODUCTION           | 268      | 0.563                | 2.466   | 0.000       | 0.000 | 3585 tags=37%, list=13%, signal=33% |
| GOBP_NEGATIVE_REGULATION_OF_RESPONSE_TO_CYTOKINE_STIMULUS | 55       | 0.492                | 1.740   | 0.001       | 0.010 | 2371 tags=24%, list=9%, signal=22%  |
| GSE9650_NAIVE_VS_EXHAUSTED_CD8_TCELL_DN                   | 183      | 0.391                | 1.646   | 0.000       | 0.001 | 3455 tags=26%, list=13%, signal=23% |
| Description (CD73)                                        | Set Size | Enrichment Score NES | p value | FDR q value | Rank  | Leading edge                        |
| GOBP_NEGATIVE_REGULATION_OF_IMMUNE_SYSTEM_PROCESS         | 362      | 0.430                | 1.272   | 0.004       | 0.006 | 7462 tags=35%, list=28%, signal=26% |
| GOBP_NEGATIVE_REGULATION_OF_CYTOKINE_PRODUCTION           | 268      | 0.463                | 1.359   | 0.001       | 0.001 | 7556 tags=37%, list=28%, signal=27% |
| GOBP_NEGATIVE_REGULATION_OF_RESPONSE_TO_CYTOKINE_STIMULUS | 55       | 0.572                | 1.569   | 0.003       | 0.005 | 5249 tags=33%, list=20%, signal=26% |
| GSE9650_NAIVE_VS_EXHAUSTED_CD8_TCELL_DN                   | 183      | 0.565                | 1.654   | 0.000       | 0.000 | 5308 tags=37%, list=20%, signal=30% |
| GSE9650_EFFECTOR_VS_EXHAUSTED_CD8_TCELL_DN                | 182      | 0.556                | 1.628   | 0.000       | 0.000 | 6251 tags=41%, list=23%, signal=31% |
| GSE9650_EXHAUSTED_VS_MEMORY_CD8_TCELL_UP                  | 183      | 0.507                | 1.484   | 0.000       | 0.000 | 5763 tags=34%, list=22%, signal=27% |

Table S10. Significantly enriched gene sets involved in negatively regulating the immune response in the high PD-L1/CD73 expression group versus the low PD-L1/CD73 expression group by gene set enrichment analysis in the GSE117556 cohort

| Description (PD-L1)                                       | Set Size | Enrichment Score | NES   | p value | FDR q value | Rank | Leading edge                   |
|-----------------------------------------------------------|----------|------------------|-------|---------|-------------|------|--------------------------------|
| GOBP_NEGATIVE_REGULATION_OF_IMMUNE_RESPONSE               | 142      | 0.576            | 2.305 | 0.000   | 0.000       | 3325 | tags=39%, list=16%, signal=33% |
| GOBP_NEGATIVE_REGULATION_OF_IMMUNE_SYSTEM_PROCESS         | 377      | 0.523            | 2.309 | 0.000   | 0.000       | 3921 | tags=40%, list=19%, signal=33% |
| GOBP_NEGATIVE_REGULATION_OF_IMMUNE_EFFECTOR_PROCESS       | 121      | 0.555            | 2.168 | 0.000   | 0.000       | 3898 | tags=40%, list=19%, signal=33% |
| GOBP_NEGATIVE_REGULATION_OF_ADAPTIVE_IMMUNE_RESPONSE      | 52       | 0.539            | 1.873 | 0.001   | 0.002       | 3898 | tags=38%, list=19%, signal=31% |
| GOBP_NEGATIVE_REGULATION_OF_CYTOKINE_PRODUCTION           | 325      | 0.527            | 2.297 | 0.000   | 0.000       | 2610 | tags=28%, list=13%, signal=25% |
| GOBP_NEGATIVE_REGULATION_OF_RESPONSE_TO_CYTOKINE_STIMULUS | 72       | 0.447            | 1.622 | 0.005   | 0.014       | 1923 | tags=24%, list=9%, signal=22%  |
| GOBP_NEGATIVE_REGULATION_OF_T_CELL_MEDIATED_IMMUNITY      | 22       | 0.616            | 1.787 | 0.004   | 0.013       | 3898 | tags=55%, list=19%, signal=44% |
| GSE9650_NAIVE_VS_EXHAUSTED_CD8_TCELL_DN                   | 178      | 0.453            | 1.852 | 0.000   | 0.000       | 2518 | tags=25%, list=12%, signal=22% |
| GSE9650_EXHAUSTED_VS_MEMORY_CD8_TCELL_UP                  | 179      | 0.406            | 1.660 | 0.000   | 0.001       | 4084 | tags=32%, list=20%, signal=26% |

  

| Description (CD73)                                  | Set Size | Enrichment Score | NES   | p value | FDR q value | Rank | Leading edge                   |
|-----------------------------------------------------|----------|------------------|-------|---------|-------------|------|--------------------------------|
| GOBP_NEGATIVE_REGULATION_OF_IMMUNE_SYSTEM_PROCESS   | 377      | 0.362            | 1.620 | 0.000   | 0.000       | 4649 | tags=34%, list=22%, signal=27% |
| GOBP_NEGATIVE_REGULATION_OF_IMMUNE_EFFECTOR_PROCESS | 121      | 0.387            | 1.522 | 0.003   | 0.007       | 4034 | tags=31%, list=19%, signal=25% |
| GOBP_NEGATIVE_REGULATION_OF_CYTOKINE_PRODUCTION     | 325      | 0.361            | 1.595 | 0.000   | 0.000       | 3407 | tags=23%, list=16%, signal=20% |
| GSE9650_NAIVE_VS_EXHAUSTED_CD8_TCELL_DN             | 178      | 0.474            | 1.953 | 0.000   | 0.000       | 3358 | tags=37%, list=16%, signal=31% |
| GSE9650_EFFECTOR_VS_EXHAUSTED_CD8_TCELL_DN          | 178      | 0.442            | 1.821 | 0.000   | 0.000       | 2769 | tags=28%, list=13%, signal=24% |
| GSE9650_EXHAUSTED_VS_MEMORY_CD8_TCELL_UP            | 179      | 0.434            | 1.789 | 0.000   | 0.000       | 4861 | tags=42%, list=23%, signal=33% |

Table S11. Significantly enriched gene sets involved in negatively regulating the immune response in the high PD-L1/CD73 expression group versus the low PD-L1/CD73 expression group by gene set enrichment analysis in the GSE31312 cohort

| Description (PD-L1)                                       | Set Size | Enrichment Score | NES   | p value | FDR q value | Rank | Leading edge                   |
|-----------------------------------------------------------|----------|------------------|-------|---------|-------------|------|--------------------------------|
| GOBP_NEGATIVE_REGULATION_OF_IMMUNE_RESPONSE               | 137      | 0.661            | 2.680 | 0.000   | 0.000       | 1576 | tags=37%, list=7%, signal=35%  |
| GOBP_NEGATIVE_REGULATION_OF_IMMUNE_SYSTEM_PROCESS         | 356      | 0.547            | 2.488 | 0.000   | 0.000       | 1712 | tags=30%, list=8%, signal=28%  |
| GOBP_NEGATIVE_REGULATION_OF_IMMUNE_EFFECTOR_PROCESS       | 119      | 0.581            | 2.302 | 0.000   | 0.000       | 1571 | tags=31%, list=7%, signal=29%  |
| GOBP_NEGATIVE_REGULATION_OF_ADAPTIVE_IMMUNE_RESPONSE      | 50       | 0.634            | 2.129 | 0.000   | 0.000       | 2660 | tags=42%, list=12%, signal=37% |
| GOBP_NEGATIVE_REGULATION_OF_CYTOKINE_PRODUCTION           | 260      | 0.551            | 2.422 | 0.000   | 0.000       | 2546 | tags=32%, list=12%, signal=29% |
| GOBP_NEGATIVE_REGULATION_OF_RESPONSE_TO_CYTOKINE_STIMULUS | 58       | 0.485            | 1.696 | 0.005   | 0.015       | 1370 | tags=22%, list=6%, signal=21%  |
| GOBP_NEGATIVE_REGULATION_OF_T_CELL_MEDIATED_IMMUNITY      | 21       | 0.767            | 2.113 | 0.000   | 0.000       | 1506 | tags=43%, list=7%, signal=40%  |
| GSE9650_NAIVE_VS_EXHAUSTED_CD8_TCELL_DN                   | 184      | 0.500            | 2.101 | 0.000   | 0.000       | 1662 | tags=22%, list=8%, signal=21%  |
| GSE9650_EFFECTOR_VS_EXHAUSTED_CD8_TCELL_DN                | 185      | 0.340            | 1.428 | 0.012   | 0.030       | 3301 | tags=25%, list=15%, signal=22% |
| GSE9650_EXHAUSTED_VS_MEMORY_CD8_TCELL_UP                  | 186      | 0.394            | 1.654 | 0.000   | 0.001       | 2979 | tags=28%, list=14%, signal=24% |

  

| Description (CD73)                                   | Set Size | Enrichment Score | NES   | p value | FDR q value | Rank | Leading edge                   |
|------------------------------------------------------|----------|------------------|-------|---------|-------------|------|--------------------------------|
| GOBP_NEGATIVE_REGULATION_OF_IMMUNE_RESPONSE          | 137      | 0.330            | 1.547 | 0.003   | 0.011       | 5870 | tags=38%, list=27%, signal=28% |
| GOBP_NEGATIVE_REGULATION_OF_IMMUNE_SYSTEM_PROCESS    | 356      | 0.261            | 1.374 | 0.005   | 0.017       | 3709 | tags=24%, list=17%, signal=20% |
| GOBP_NEGATIVE_REGULATION_OF_IMMUNE_EFFECTOR_PROCESS  | 119      | 0.352            | 1.618 | 0.001   | 0.006       | 3503 | tags=27%, list=16%, signal=23% |
| GOBP_NEGATIVE_REGULATION_OF_INNATE_IMMUNE_RESPONSE   | 59       | 0.397            | 1.588 | 0.007   | 0.022       | 2798 | tags=25%, list=13%, signal=22% |
| GOBP_NEGATIVE_REGULATION_OF_ADAPTIVE_IMMUNE_RESPONSE | 50       | 0.461            | 1.765 | 0.001   | 0.006       | 5536 | tags=48%, list=26%, signal=36% |
| GOBP_NEGATIVE_REGULATION_OF_CYTOKINE_PRODUCTION      | 260      | 0.330            | 1.680 | 0.000   | 0.000       | 4931 | tags=32%, list=23%, signal=25% |
| GSE9650_NAIVE_VS_EXHAUSTED_CD8_TCELL_DN              | 184      | 0.312            | 1.527 | 0.003   | 0.013       | 2960 | tags=28%, list=14%, signal=24% |
| GSE9650_EFFECTOR_VS_EXHAUSTED_CD8_TCELL_DN           | 185      | 0.323            | 1.584 | 0.001   | 0.004       | 3060 | tags=26%, list=14%, signal=23% |

Table S12. Significantly enriched gene sets involved in negatively regulating the immune response in the high PD-L1/CD73 expression group versus the low PD-L1/CD73 expression group by gene set enrichment analysis in the GSE147986 cohort

| Description (PD-L1)                                  | Set Size | Enrichment Score | NES   | p value | FDR q value | Rank | Leading edge                   |
|------------------------------------------------------|----------|------------------|-------|---------|-------------|------|--------------------------------|
| GOBP_NEGATIVE_REGULATION_OF_IMMUNE_RESPONSE          | 133      | 0.435            | 2.127 | 0.000   | 0.000       | 3070 | tags=37%, list=16%, signal=31% |
| GOBP_NEGATIVE_REGULATION_OF_IMMUNE_EFFECTOR_PROCESS  | 113      | 0.392            | 1.864 | 0.000   | 0.000       | 2036 | tags=28%, list=11%, signal=25% |
| GOBP_NEGATIVE_REGULATION_OF_INNATE_IMMUNE_RESPONSE   | 59       | 0.413            | 1.774 | 0.001   | 0.010       | 3377 | tags=39%, list=17%, signal=32% |
| GOBP_NEGATIVE_REGULATION_OF_ADAPTIVE_IMMUNE_RESPONSE | 49       | 0.520            | 2.162 | 0.000   | 0.000       | 2897 | tags=43%, list=15%, signal=37% |
| GOBP_NEGATIVE_REGULATION_OF_T_CELL_MEDIATED_IMMUNITY | 20       | 0.690            | 2.283 | 0.000   | 0.001       | 2897 | tags=55%, list=15%, signal=47% |

  

| Description (CD73)                                        | Set Size | Enrichment Score | NES   | p value | FDR q value | Rank | Leading edge                   |
|-----------------------------------------------------------|----------|------------------|-------|---------|-------------|------|--------------------------------|
| GOBP_NEGATIVE_REGULATION_OF_IMMUNE_SYSTEM_PROCESS         | 350      | 0.382            | 1.442 | 0.001   | 0.002       | 4620 | tags=31%, list=24%, signal=24% |
| GOBP_NEGATIVE_REGULATION_OF_CYTOKINE_PRODUCTION           | 257      | 0.400            | 1.489 | 0.001   | 0.003       | 4533 | tags=34%, list=23%, signal=27% |
| GOBP_NEGATIVE_REGULATION_OF_RESPONSE_TO_CYTOKINE_STIMULUS | 57       | 0.544            | 1.711 | 0.001   | 0.003       | 3528 | tags=35%, list=18%, signal=29% |
| GSE9650_NAIVE_VS_EXHAUSTED_CD8_TCELL_DN                   | 174      | 0.483            | 1.746 | 0.000   | 0.000       | 3907 | tags=40%, list=20%, signal=32% |
| GSE9650_EFFECTOR_VS_EXHAUSTED_CD8_TCELL_DN                | 173      | 0.507            | 1.833 | 0.000   | 0.000       | 4560 | tags=46%, list=24%, signal=35% |
| GSE9650_EXHAUSTED_VS_MEMORY_CD8_TCELL_UP                  | 174      | 0.466            | 1.685 | 0.000   | 0.000       | 3052 | tags=30%, list=16%, signal=25% |

Table S13. Numbers of different types of CD8<sup>+</sup> T cells per patient in the single-cell RNA sequencing cohort

| Sample ID | total CD8 <sup>+</sup> T cells | dysfunctional CD8 <sup>+</sup> T cells (cluster 1) | percentage of dysfunctional CD8 <sup>+</sup> T cells | No. of PD-1 and/or A2aR expression on CD8 <sup>+</sup> T cells |
|-----------|--------------------------------|----------------------------------------------------|------------------------------------------------------|----------------------------------------------------------------|
| DLBCL002  | 1111                           | 237                                                | 21%                                                  | 366                                                            |
| DLBCL007  | 284                            | 173                                                | 61%                                                  | 190                                                            |
| DLBCL008  | 460                            | 356                                                | 77%                                                  | 359                                                            |
| DLBCL111  | 2381                           | 1139                                               | 48%                                                  | 1160                                                           |

adjusted

| Sample ID | total CD8 <sup>+</sup> T cells | dysfunctional CD8 <sup>+</sup> T cells (cluster 1) | percentage of dysfunctional CD8 <sup>+</sup> T cells | No. of PD-1 and/or A2aR expression on CD8 <sup>+</sup> T cells |
|-----------|--------------------------------|----------------------------------------------------|------------------------------------------------------|----------------------------------------------------------------|
| DLBCL002  | 2381                           | 507                                                | 21%                                                  | 784                                                            |
| DLBCL007  | 2381                           | 1450                                               | 61%                                                  | 1592                                                           |
| DLBCL008  | 2381                           | 1842                                               | 77%                                                  | 1858                                                           |
| DLBCL111  | 2381                           | 1139                                               | 48%                                                  | 1160                                                           |

Table S14. Numbers of CD8<sup>+</sup> T cells with PD-1 and A2aR expression per mm<sup>2</sup> in the overall population

| Sample ID | No. of CD8 <sup>+</sup> T cells with PD-1 expression/mm <sup>2</sup> | No. of CD8 <sup>+</sup> T cells with A2aR expression/mm <sup>2</sup> |
|-----------|----------------------------------------------------------------------|----------------------------------------------------------------------|
| 4         | 19.9                                                                 | 22.7                                                                 |
| 8         | 0.0                                                                  | 0.0                                                                  |
| 9         | 33.2                                                                 | 5.3                                                                  |
| 11        | 0.1                                                                  | 0.0                                                                  |
| 12        | 11.4                                                                 | 0.2                                                                  |
| 14        | 57.3                                                                 | 26.0                                                                 |
| 15        | 8.1                                                                  | 0.0                                                                  |
| 17        | 9.2                                                                  | 2.2                                                                  |
| 18        | 9.3                                                                  | 5.4                                                                  |
| 20        | 1.0                                                                  | 2.9                                                                  |
| 21        | 0.6                                                                  | 2.2                                                                  |
| 22        | 23.5                                                                 | 8.4                                                                  |
| 24        | 1.6                                                                  | 0.0                                                                  |
| 25        | 25.0                                                                 | 5.3                                                                  |
| 26        | 133.5                                                                | 143.4                                                                |
| 30        | 8.0                                                                  | 0.0                                                                  |
| 31        | 41.7                                                                 | 9.4                                                                  |
| 32        | 20.8                                                                 | 0.2                                                                  |
| 34        | 8.3                                                                  | 0.0                                                                  |
| 37        | 112.0                                                                | 0.0                                                                  |
| 38        | 6.9                                                                  | 0.0                                                                  |
| 40        | 128.7                                                                | 2.0                                                                  |
| 43        | 0.2                                                                  | 0.0                                                                  |
| 45        | 197.3                                                                | 19.4                                                                 |
| 46        | 32.4                                                                 | 3.6                                                                  |
| 49        | 68.5                                                                 | 0.1                                                                  |
| 50        | 41.6                                                                 | 82.8                                                                 |
| 51        | 0.2                                                                  | 0.0                                                                  |
| 55        | 44.9                                                                 | 0.0                                                                  |
| 56        | 5.3                                                                  | 11.6                                                                 |
| 57        | 7.4                                                                  | 0.0                                                                  |
| 59        | 0.0                                                                  | 0.0                                                                  |
| 60        | 7.1                                                                  | 0.0                                                                  |
| 61        | 8.4                                                                  | 0.0                                                                  |
| 62        | 7.2                                                                  | 0.0                                                                  |

|     |       |       |
|-----|-------|-------|
| 65  | 32.7  | 0.0   |
| 68  | 54.6  | 59.7  |
| 69  | 8.2   | 22.2  |
| 70  | 7.1   | 33.4  |
| 71  | 19.1  | 17.7  |
| 73  | 11.0  | 0.0   |
| 74  | 9.3   | 0.1   |
| 76  | 0.0   | 0.0   |
| 79  | 7.1   | 0.0   |
| 80  | 9.2   | 11.2  |
| 81  | 153.7 | 40.0  |
| 82  | 0.0   | 25.6  |
| 83  | 2.5   | 0.0   |
| 85  | 82.4  | 74.4  |
| 88  | 0.1   | 0.0   |
| 89  | 0.0   | 0.0   |
| 91  | 38.7  | 60.0  |
| 92  | 3.6   | 243.2 |
| 93  | 0.0   | 0.0   |
| 95  | 0.0   | 0.0   |
| 96  | 11.4  | 15.3  |
| 97  | 3.5   | 0.2   |
| 98  | 196.1 | 22.7  |
| 99  | 42.8  | 14.1  |
| 100 | 50.8  | 105.7 |
| 203 | 0.6   | 10.9  |
| 204 | 32.0  | 20.9  |
| 205 | 76.2  | 0.5   |
| 207 | 26.8  | 0.0   |
| 210 | 107.2 | 113.9 |
| 213 | 132.6 | 10.6  |
| 214 | 8.7   | 4.5   |
| 216 | 7.1   | 35.6  |
| 226 | 3.4   | 0.2   |
| 229 | 0.2   | 0.4   |
| 231 | 0.2   | 31.0  |
| 232 | 1.4   | 0.7   |
| 234 | 0.0   | 6.4   |
| 237 | 4.9   | 1.7   |
| 238 | 0.1   | 3.0   |

---

|     |       |       |
|-----|-------|-------|
| 239 | 46.7  | 194.5 |
| 240 | 8.3   | 18.2  |
| 241 | 107.6 | 0.0   |
| 242 | 33.3  | 28.3  |
| 243 | 10.8  | 23.3  |
| 244 | 16.2  | 3.4   |
| 245 | 2.8   | 5.9   |
| 246 | 3.2   | 0.0   |
| 248 | 19.8  | 26.9  |
| 249 | 0.3   | 0.0   |
| 250 | 227.4 | 45.8  |
| 252 | 23.1  | 87.1  |
| 253 | 1.1   | 10.1  |
| 254 | 19.5  | 0.0   |
| 255 | 17.0  | 13.9  |
| 256 | 10.1  | 10.0  |
| 257 | 1.2   | 1.4   |
| 258 | 2.4   | 0.0   |
| 259 | 41.4  | 72.2  |
| 261 | 5.5   | 12.8  |
| 262 | 51.0  | 48.7  |
| 263 | 3.6   | 0.0   |
| 264 | 50.5  | 17.0  |
| 265 | 101.8 | 123.3 |
| 266 | 77.0  | 38.8  |
| 268 | 234.3 | 74.8  |
| 269 | 8.1   | 10.8  |
| 270 | 3.5   | 36.7  |
| 271 | 3.6   | 10.1  |
| 272 | 5.9   | 32.8  |
| 273 | 7.1   | 4.6   |
| 274 | 11.6  | 2.3   |
| 277 | 8.7   | 0.1   |
| 279 | 22.5  | 44.4  |

---



Table S15. Association of dysfunctional CD8<sup>+</sup> T cells (PD-1<sup>+</sup>CD8<sup>+</sup> T cells) and clinicopathological parameters

| Parameters     | N (%)     | PD-1 <sup>-</sup> CD8 <sup>+</sup> T cells | PD-1 <sup>+</sup> CD8 <sup>+</sup> T cells | p value |
|----------------|-----------|--------------------------------------------|--------------------------------------------|---------|
| Sex            |           |                                            |                                            |         |
| Male           | 54 (49.5) | 27 (50.0)                                  | 27 (49.1)                                  | 0.924   |
| Female         | 55 (50.5) | 27 (50.0)                                  | 28 (50.9)                                  |         |
| Age (years)    |           |                                            |                                            |         |
| ≤60            | 70 (64.2) | 42 (77.8)                                  | 28 (50.9)                                  | 0.003   |
| >60            | 39 (35.8) | 12 (22.2)                                  | 27 (49.1)                                  |         |
| B symptom      |           |                                            |                                            |         |
| Yes            | 19 (17.4) | 6 (11.1)                                   | 13 (23.6)                                  | 0.085   |
| No             | 90 (82.6) | 48 (88.9)                                  | 42 (76.4)                                  |         |
| Clinical stage |           |                                            |                                            |         |
| I-II           | 57 (52.3) | 34 (63.0)                                  | 23 (41.8)                                  | 0.027   |
| III-IV         | 52 (47.7) | 20 (37.0)                                  | 32 (58.2)                                  |         |
| LDH            |           |                                            |                                            |         |
| Normal         | 57 (52.3) | 33 (61.1)                                  | 24 (43.6)                                  | 0.068   |
| High           | 52 (47.7) | 21 (38.9)                                  | 31 (56.4)                                  |         |
| IPI Scores     |           |                                            |                                            |         |
| 0-2            | 77 (70.6) | 45 (83.3)                                  | 32 (58.2)                                  | 0.004   |
| 3-5            | 32 (29.4) | 9 (16.7)                                   | 23 (41.8)                                  |         |
| Subtypes       |           |                                            |                                            |         |
| GCB            | 45 (41.3) | 26 (48.1)                                  | 19 (34.5)                                  | 0.329   |
| Non-GCB        | 56 (51.4) | 25 (46.3)                                  | 31 (56.4)                                  |         |
| Unclassified   | 8 (7.3)   | 3 (5.6)                                    | 5 (9.1)                                    |         |

Table S16. Association of dysfunctional CD8<sup>+</sup> T cells (A2aR<sup>+</sup>CD8<sup>+</sup> T cells) and clinicopathological parameters

| Parameters     | N (%)     | A2aR <sup>-</sup> CD8 <sup>+</sup> T cells | A2aR <sup>+</sup> CD8 <sup>+</sup> T cells | p value |
|----------------|-----------|--------------------------------------------|--------------------------------------------|---------|
| Sex            |           |                                            |                                            |         |
| Male           | 54 (49.5) | 13 (43.3)                                  | 41 (51.9)                                  | 0.424   |
| Female         | 55 (50.5) | 17 (56.7)                                  | 38 (48.1)                                  |         |
| Age (years)    |           |                                            |                                            |         |
| ≤60            | 70 (64.2) | 22 (73.3)                                  | 48 (60.8)                                  | 0.221   |
| >60            | 39 (35.8) | 8 (26.7)                                   | 31 (39.2)                                  |         |
| B symptom      |           |                                            |                                            |         |
| Yes            | 19 (17.4) | 2 (6.7)                                    | 17 (21.5)                                  | 0.068   |
| No             | 90 (82.6) | 28 (93.3)                                  | 62 (78.5)                                  |         |
| Clinical stage |           |                                            |                                            |         |
| I-II           | 57 (52.3) | 23 (76.7)                                  | 34 (43.0)                                  | 0.002   |
| III-IV         | 52 (47.7) | 7 (23.3)                                   | 45 (57.0)                                  |         |
| LDH            |           |                                            |                                            |         |
| Normal         | 57 (52.3) | 20 (66.7)                                  | 37 (46.8)                                  | 0.064   |
| High           | 52 (47.7) | 10 (33.3)                                  | 42 (53.2)                                  |         |
| IPI Scores     |           |                                            |                                            |         |
| 0-2            | 77 (73.8) | 26 (86.7)                                  | 51 (64.6)                                  | 0.024   |
| 3-5            | 32 (26.2) | 4 (13.3)                                   | 28 (35.4)                                  |         |
| Subtypes       |           |                                            |                                            |         |
| GCB            | 45 (41.3) | 11 (36.7)                                  | 34 (43.0)                                  | 0.793   |
| Non-GCB        | 56 (51.4) | 17 (56.7)                                  | 39 (49.4)                                  |         |
| Unclassified   | 8 (7.3)   | 2 (6.6)                                    | 6 (7.6)                                    |         |
