# Supplementary material for: Genetic characteristics involving the PD-1/PD-L1/L2 and CD73/A2aR axes and the immunosuppressive microenvironment in DLBCL
Source: PubMed Central journal article supplement — J Immunother Cancer. 2022 Apr 1;10(4):e004114. doi: 10.1136/jitc-2021-004114 (PMC8977791; doi:10.1136/jitc-2021-004114), 2022-04-01
Supplement: jitc-2021-004114supp003.pdf [file jitc-2021-004114supp003.pdf]

### Supplementary figures and figure legends

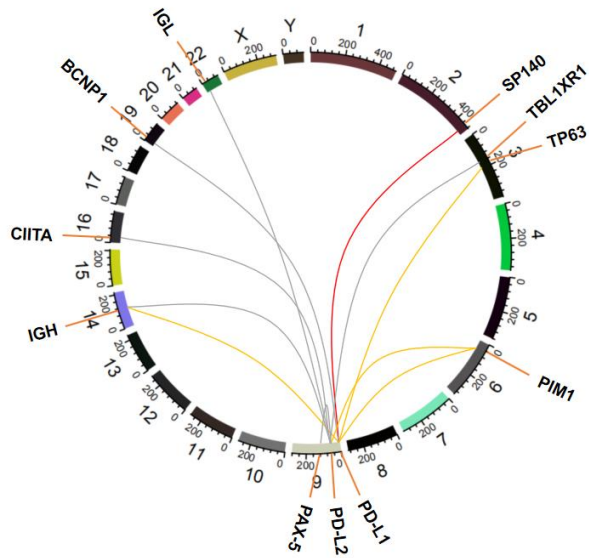

**Figure S1. Summary of known translocations involving the PD-L1/L2 loci and one novel gene fusion in diffuse large B-cell lymphoma.** Translocations involving PD-L1/L2 loci demonstrated by other investigators are depicted in gray, and those characterized by a previous study of ours are depicted in orange. The novel gene fusion identified in our study is depicted in red.

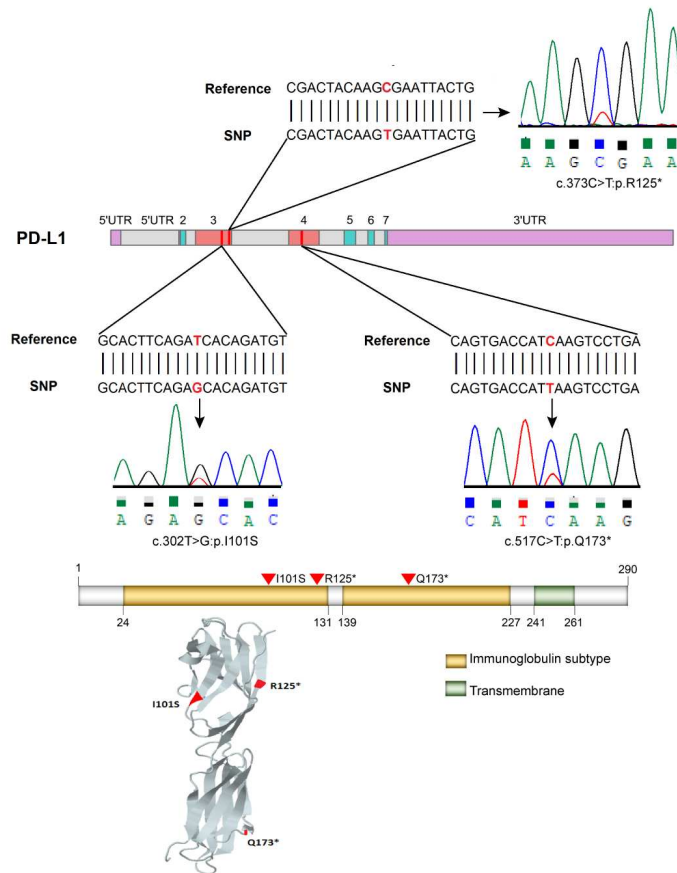

**Figure S2. Schematic representation of PD-L1 showing the locations of alterations.** Distribution of PD-L1 alterations identified by targeted deep sequencing and subsequently validated via Sanger sequencing in genomic and protein maps showing the locations and variations of nucleotide/amino acid substitutions. The protein 3D structure of PD-L1 was obtained from the Missense 3D database.

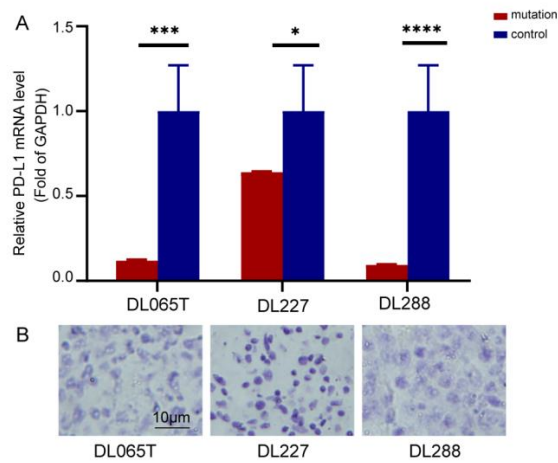

**Figure S3. Expression of PD-L1 in samples with PD-L1 genetic mutations.** (A) Relative PD-L1 mRNA expression in samples with PD-L1 genetic mutations. Three samples of patients with lymphoproliferative diseases were used as a control. (B) PD-L1 immunostaining in samples with PD-L1 genetic mutations. The images were captured at 400× magnification. \* =  $p < 0.05$ , \*\*\* =  $p < 0.0001$ , \*\*\*\* =  $p < 0.00001$ .

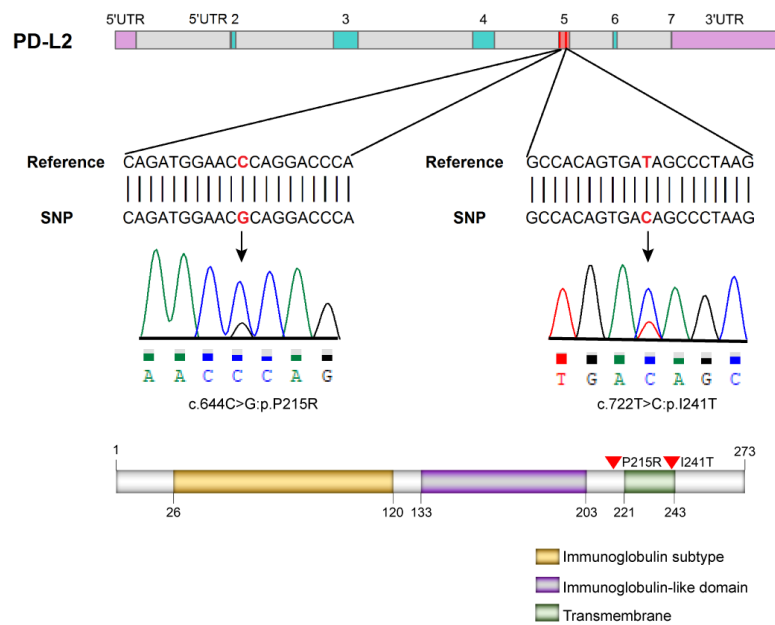

**Figure S4. Schematic representation of PD-L2 showing the locations of alterations.** Distribution of PD-L2 alterations identified by targeted deep sequencing and subsequently validated by Sanger sequencing in genomic and protein maps showing locations and variations of nucleotide/amino acid substitutions. The protein 3D structure of PD-L2 was not obtained from the Missense 3D database.

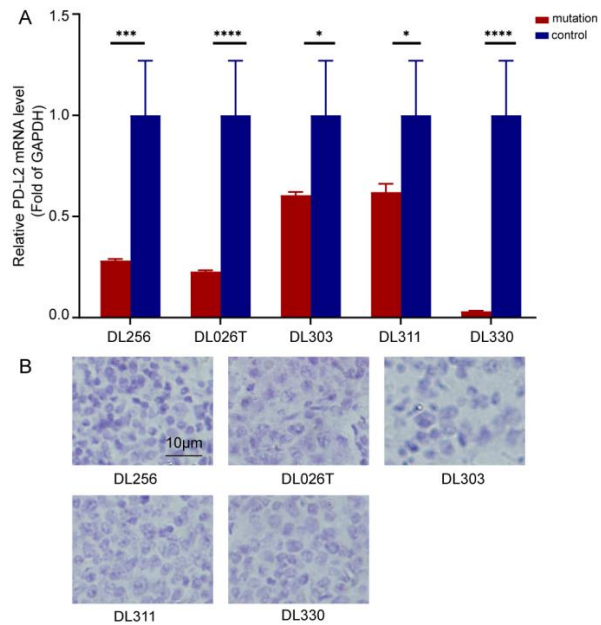

**Figure S5. PD-L2 expression in samples with PD-L2 genetic mutations. (A)**

Relative PD-L2 mRNA expression in samples with PD-L2 genetic mutations. Three samples of patients with lymphoproliferative diseases were used as a control. (B)

PD-L2 immunostaining in samples with PD-L2 genetic mutations. Images were

captured at 400× magnification. \* =  $p < 0.05$ , \*\*\* =  $p < 0.0001$ , \*\*\*\* =  $p < 0.00001$ .

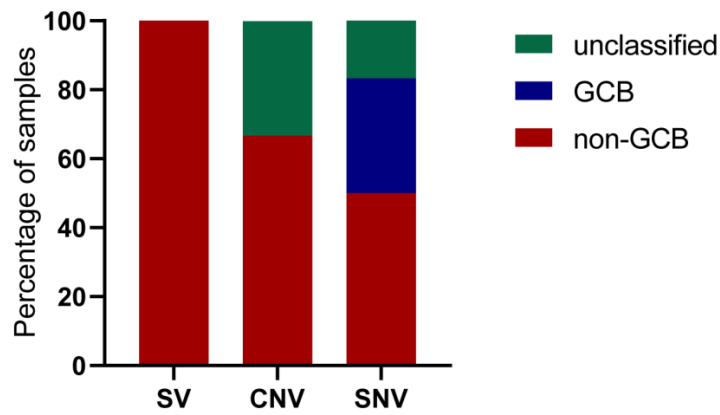

**Figure S6. Distribution of diffuse large B-cell lymphoma subtypes in different genetic alterations, including SVs (n=2), CNVs (n = 3), and SNVs (n=12). SVs: structural variations; CNVs: copy number variations; SNVs: single nucleotide variants.**

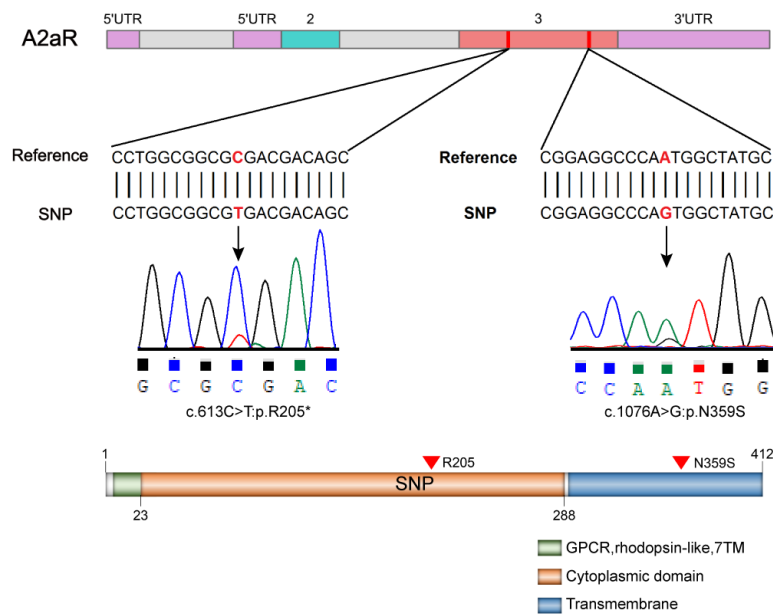

**Figure S7. Schematic representation of A2aR showing the locations of alterations.**

Distribution of A2aR alterations identified by targeted deep sequencing and subsequently validated by Sanger sequencing in genomic and protein maps showing the locations and variations of nucleotide/amino acid substitutions. The protein 3D structure of A2aR was not obtained from the Missense 3D database.

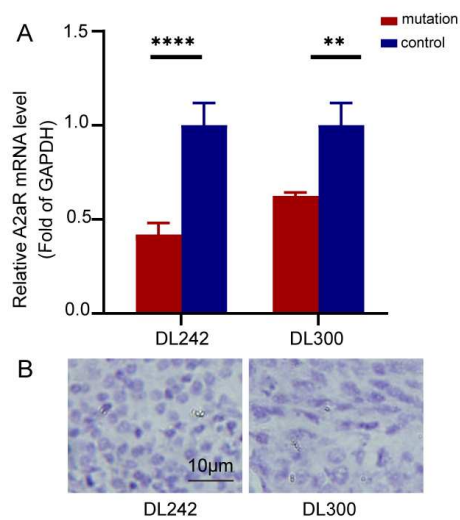

**Figure S8. A2aR expression in samples with A2aR genetic mutations.** (A) Relative A2aR mRNA expression in samples with A2aR genetic mutations. Three samples of patients with lymphoproliferative diseases were used as a control. (B) A2aR immunostaining in samples with A2aR genetic mutations. The images were captured at 400× magnification. \*\* =  $p < 0.001$ , \*\*\*\* =  $p < 0.00001$ .



## A high PD-L1 expression vs. low PD-L1 expression

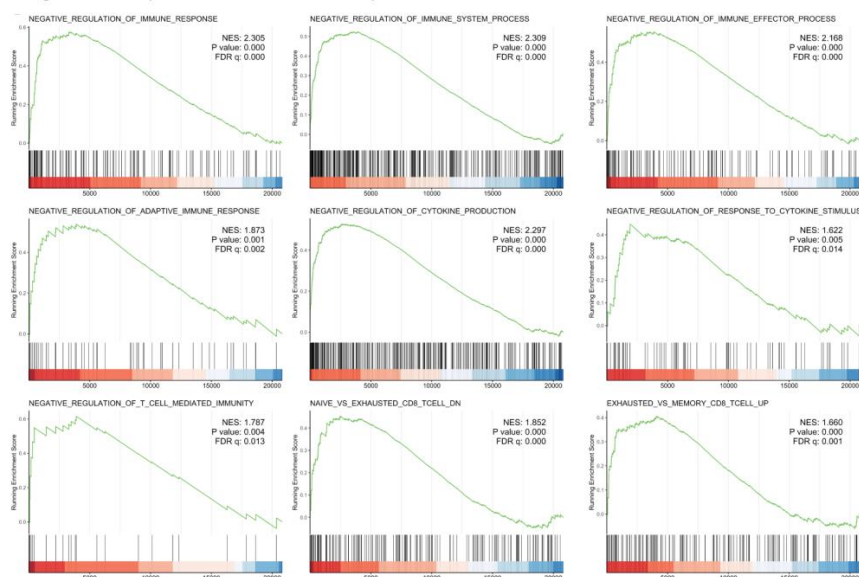

## B high CD73 expression vs. low CD73 expression

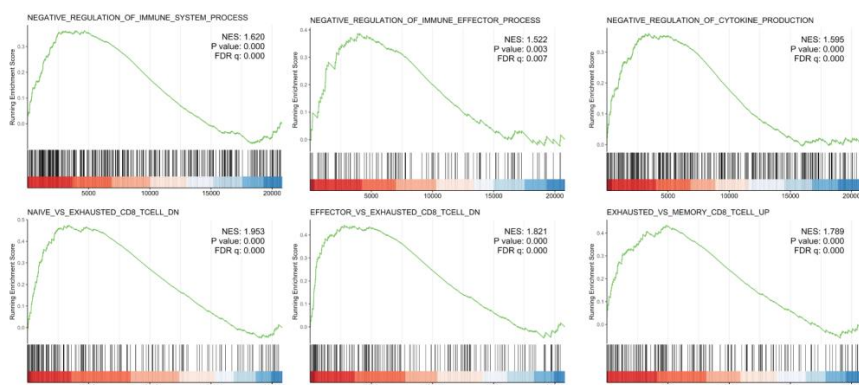

**Figure S9. Significantly enriched gene sets involved in negatively regulating the immune response in the high PD-L1 (A) / CD73 (B) expression group versus the low PD-L1/CD73 expression group by gene set enrichment analysis in the GSE117556 cohort.  $|NES| > 1$ ,  $p$  value  $< 0.05$ , and  $FDR$   $q$  value  $< 0.05$  were considered statistically significant. NES: normalized enrichment score, FDR: false discovery rate.**

## A high PD-L1 expression vs. low PD-L1 expression

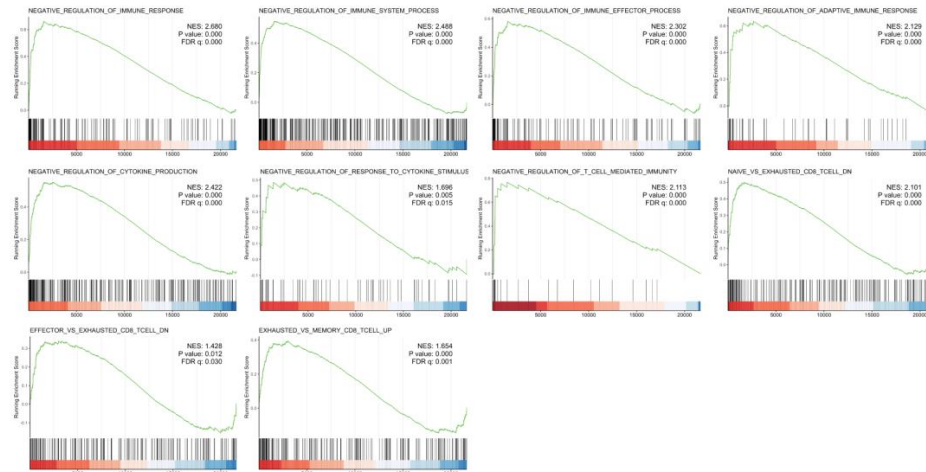

## B high CD73 expression vs. low CD73 expression

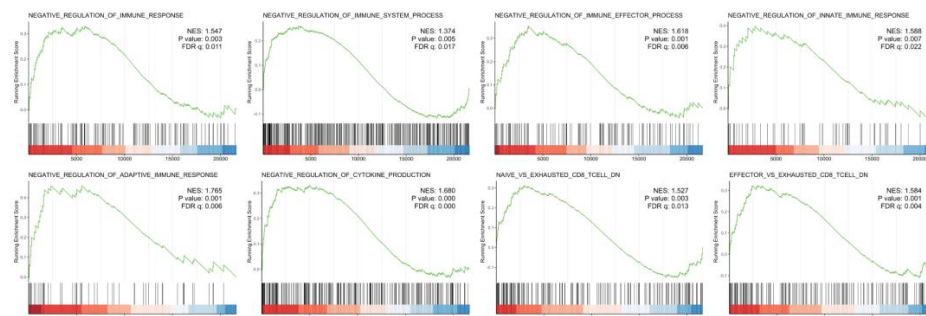

**Figure S10. Significantly enriched gene sets involved in negatively regulating the immune response in the high PD-L1 (A) / CD73 (B) expression group versus the low PD-L1/CD73 expression group by gene set enrichment analysis in the GSE31312 cohort.  $|NES| > 1$ ,  $p$  value  $< 0.05$ , and  $FDR$   $q$  value  $< 0.05$  were considered statistically significant. NES: normalized enrichment score, FDR: false discovery rate.**

### A high PD-L1 expression vs. low PD-L1 expression

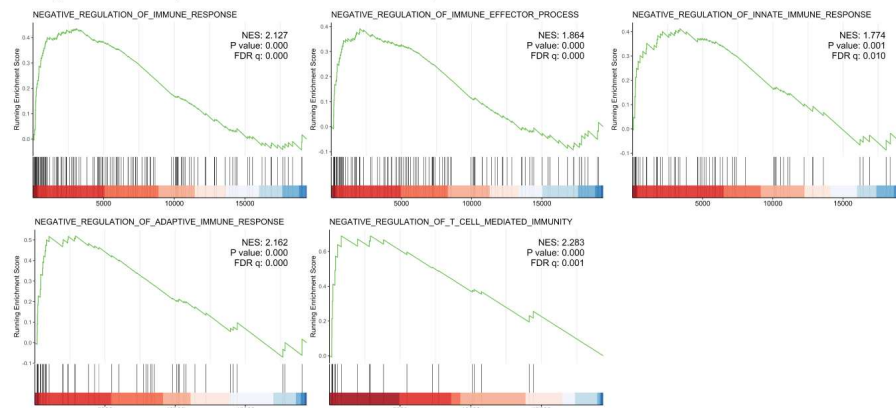

### B high CD73 expression vs. low CD73 expression

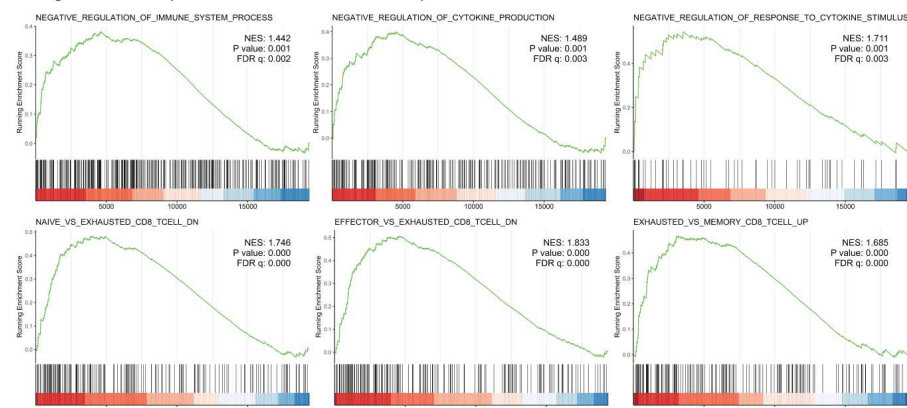

**Figure S11. Significantly enriched gene sets involved in negatively regulating the immune response in the high PD-L1 (A) / CD73 (B) expression group versus the low PD-L1/CD73 expression group by gene set enrichment analysis in the GSE147986 cohort.  $|NES| > 1$ ,  $p$  value  $< 0.05$ , and  $FDR$   $q$  value  $< 0.05$  were considered statistically significant. NES: normalized enrichment score, FDR: false discovery rate.**

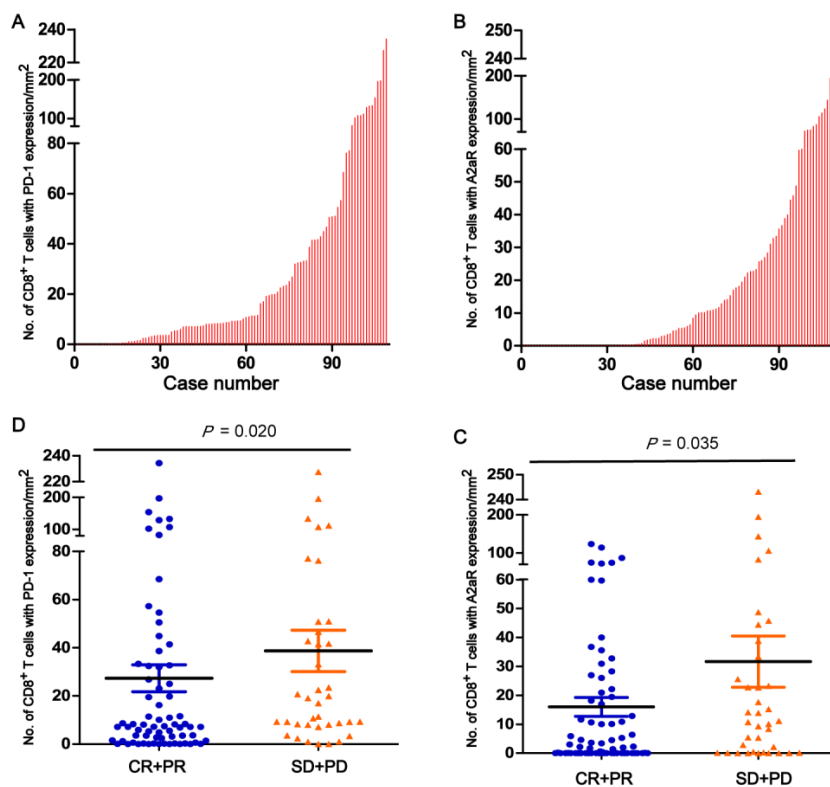

**Figure S12. Correlation between PD-1 and A2aR expression on CD8<sup>+</sup> T cells and clinical responses in diffuse large B-cell lymphoma.** (A-B) Numbers of CD8<sup>+</sup> T cells with PD-1 and A2aR expression per mm<sup>2</sup> in the overall population. The cases are ordered from lowest to highest according to cell numbers/mm<sup>2</sup> of PD-1 and A2aR expression. (C-D) The association between PD-1 and A2aR expression on CD8<sup>+</sup> T cells and clinical responses. CR: complete response; PR: partial response; SD: stable disease; PD: progressive disease.
